# Supplementary material for: Multiwalled carbon nanotube-coated polyethylene terephthalate fibrous matrices for enhanced neuronal differentiation of mouse embryonic stem cells
Source: Royal Society of Chemistry journal article supplement (doi:10.1039/c2tb00157h), 2012-11-08
Supplement: c2tb00157h.pdf [file c2tb00157h.pdf]

## Supplemental Materials

### Raman Spectroscopy

The Raman spectra were collected on a Renishaw Invia Raman spectrometer. The excitation source at 514.5 nm was generated using the 514.5 nm diode laser with maximum power of 500 mW. MWCNTs have distinct Raman resonances, namely D and G modes observed at 1330 and 1580  $\text{cm}^{-1}$ , respectively. The D and G bands were present in MWCNT-decorated PET scaffolds but absent in the PET (control), confirming the deposition of MWCNTs on the PET surface.

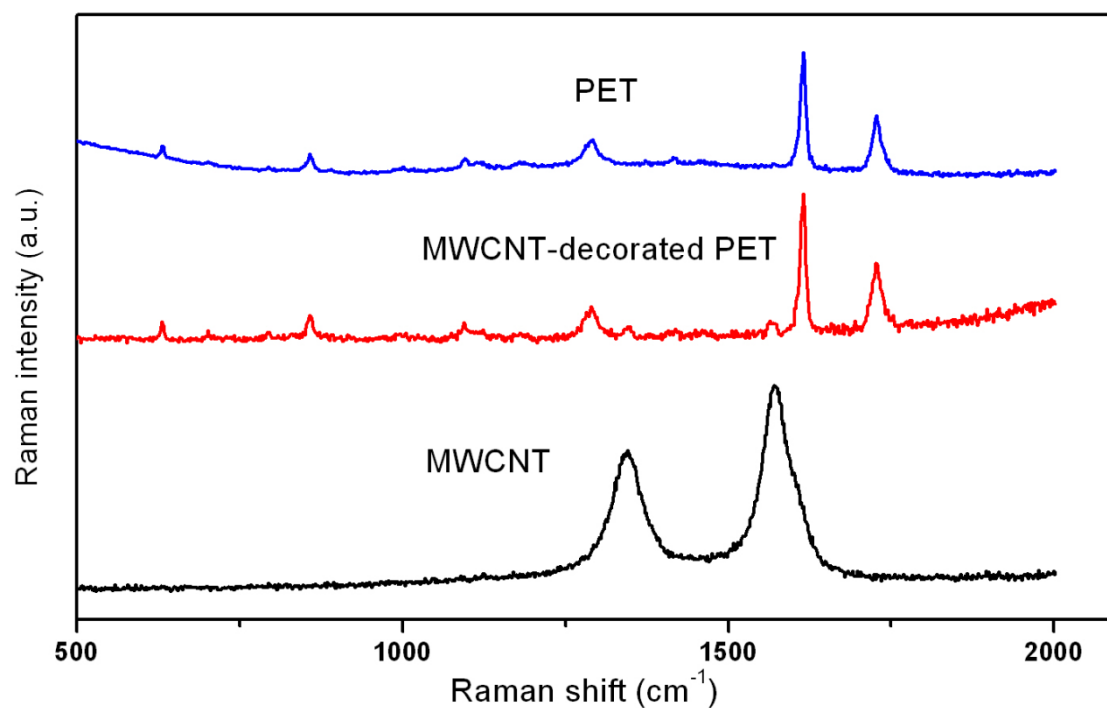

Raman spectrometry for MWCNTs, MWCNT-decorated and non-decorated PET matrices.
